# Supplementary material for: Fouling-resistant membranes for separation of oil-in-water emulsions
Source: Royal Society of Chemistry journal article supplement (doi:10.1039/c7ra13605f), 2018-01-01
Supplement: c7ra13605f1.pdf [file c7ra13605f1.pdf]

## Supplementary Information

# Fouling-Resistant Membranes for Separation of Oil-in-Water Emulsions

Guangyu Zhang,<sup>a</sup> Longbiao Li,<sup>a</sup> Yan Huang,<sup>a</sup> Atsushi Hozumi,<sup>b</sup> Tsutomu Sonoda,<sup>b</sup> and  
Zhaohui Su<sup>a\*</sup>

<sup>a</sup> State Key Laboratory of Polymer Physics and Chemistry, Changchun Institute of Applied Chemistry, Chinese Academy of Sciences, Changchun 130022, P. R. China

<sup>b</sup> National Institute of Advanced Industrial Science and Technology (AIST), 2266-98 Anagahora, Shimoshidami, Moriyama, Nagoya 463-8560, Japan

\*Corresponding author: [zhsu@ciac.ac.cn](mailto:zhsu@ciac.ac.cn) (Z.S.)

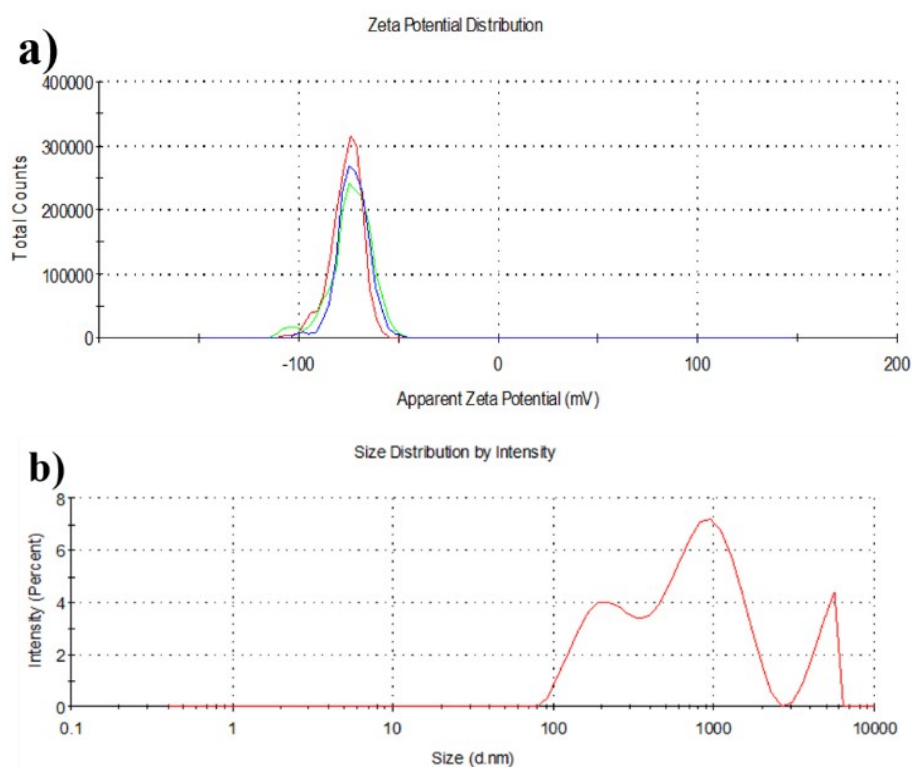

**Figure S1.** (a) Zeta potential distribution of SDS emulsified diesel oil-in-water emulsion; (b) Size distribution of SDS stabilized diesel oil-in-water emulsion.

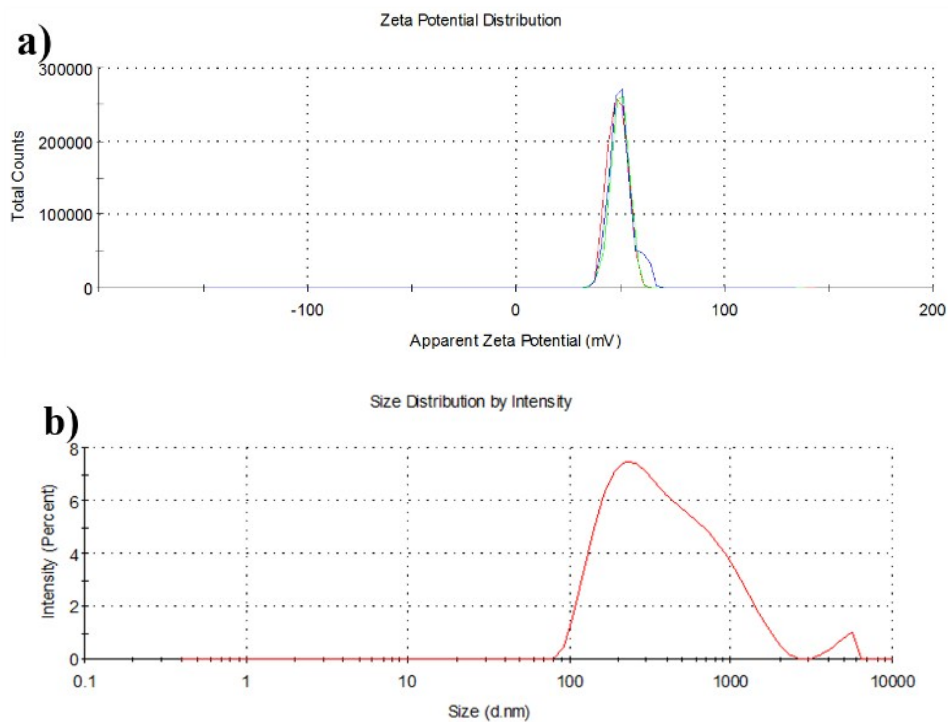

**Figure S2.** (a) Zeta potential distribution of CTAB emulsified diesel oil-in-water emulsion; (b) Size distribution of CTAB stabilized diesel oil-in-water emulsion.

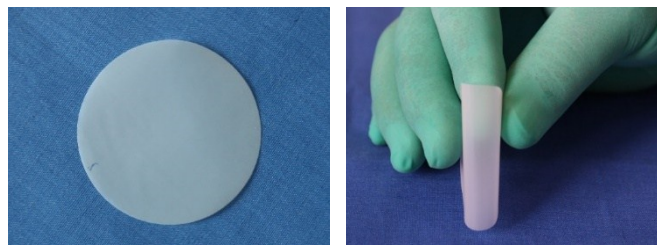

**Figure S3.** Photograph of bare polycarbonate porous membrane with pore size of 200 nm.

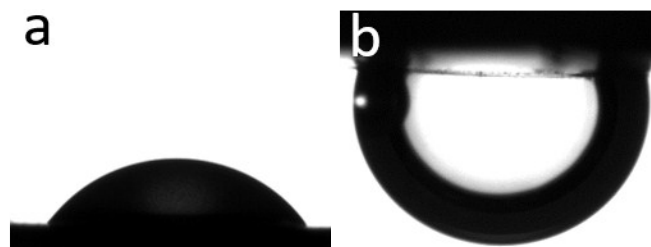

**Figure S4.** Optical images of (a) a water droplet in air and (b) a diesel oil droplet in water, on the polycarbonate membrane surface.

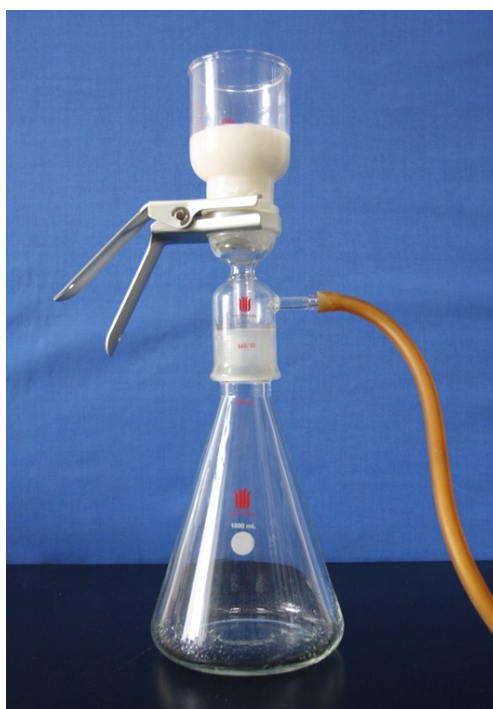

**Figure S5.** Photograph of the home-made filtration device. The milky-white oil-in-water emulsion is fed to the funnel, and water permeating through the membrane is collected in the flask.

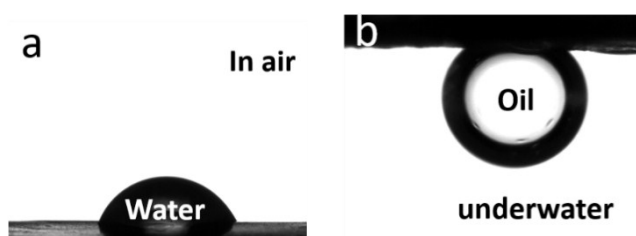

**Figure S6.** Wettability of PEM4-coated polycarbonate membrane surface: (a) water contact angle of in air, and (b) diesel oil contact angle underwater.

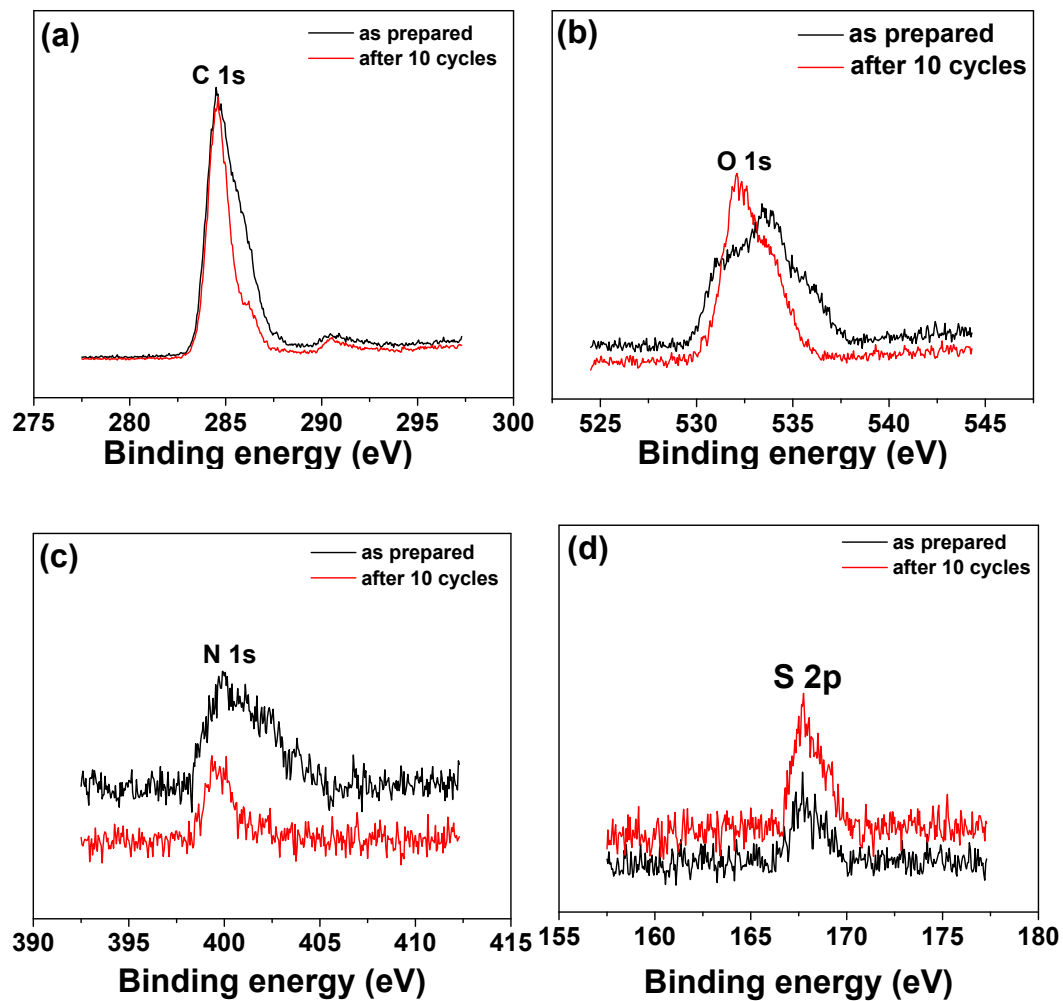

**Figure S7.** Different regions of XPS spectra on (PDDA/PSS)<sub>3</sub> surfaces, the comparison of element composition on bare PEM/PC surfaces and filtered PEM/PC surfaces (filtrating dionized water 100 min). (a) C 1s, (b) O 1s, (c) N 1s; (d) S 2p.
